# Supplementary material
Source: Research Square preprint supplement (doi:10.21203/rs.3.rs-9953387/v1)
Supplement: Supplementary file 1 [file 0a69bbb6669ea2a7dd6c062d.docx]

**Search Strategy on 28th February 2026**

| DATABASES | OUTPUT |
| --- | --- |
| Pubmed | 588 |
| CINAHL | 426 |
| MEDline | 1127 |
| WEB OF SCIENCE | 1092 |
|  |  |
|  |  |
|  |  |
|  |  |
|  |  |

**History and Search Details**Top of FormBottom of Form

Pubmed 28th feb 2026

| **Search** | **Actions** | **Details** | **Query** | **Results** | **Time** |
| --- | --- | --- | --- | --- | --- |
| #7 |  |  | Search: **(#5) AND (#6)** | [588](https://pubmed.ncbi.nlm.nih.gov/?term=%28%235%29+AND+%28%236%29&sort=) | 07:57:13 |
| #6 |  |  | Search: **(((((((Adolescent[Title/Abstract]) OR (Teenager[Title/Abstract])) OR (Young Person[Title/Abstract])) OR (Young Adult[Title/Abstract])) OR (Pubescent[Title/Abstract])) OR (Adolescent living with HIV[Title/Abstract])) OR (ALHIV[Title/Abstract])) OR (Youth[Title/Abstract])** | [329,355](https://pubmed.ncbi.nlm.nih.gov/?term=%28%28%28%28%28%28%28Adolescent%5BTitle%2FAbstract%5D%29+OR+%28Teenager%5BTitle%2FAbstract%5D%29%29+OR+%28Young+Person%5BTitle%2FAbstract%5D%29%29+OR+%28Young+Adult%5BTitle%2FAbstract%5D%29%29+OR+%28Pubescent%5BTitle%2FAbstract%5D%29%29+OR+%28Adolescent+living+with+HIV%5BTitle%2FAbstract%5D%29%29+OR+%28ALHIV%5BTitle%2FAbstract%5D%29%29+OR+%28Youth%5BTitle%2FAbstract%5D%29&sort=) | 07:37:30 |
| #5 |  |  | Search: **(((((((((((ART Adherence[Title/Abstract]) OR (ART Compliance[Title/Abstract])) OR (Antiretroviral Adherence[Title/Abstract])) OR (ART Medication Adherence[Title/Abstract])) OR (ART Treatment Compliance[Title/Abstract])) OR (Anti retroviral Therapy Adherence[Title/Abstract])) OR (Anti-retroviral Therapy Adherence[Title/Abstract])) ) OR (HAART Adherence[Title/Abstract])) OR (Highly Active Antiretroviral Therapy Adherence[Title/Abstract])) ) OR (Retention of HIV Care[Title/Abstract])) OR (Viral Suppression[Title/Abstract])** | [10,011](https://pubmed.ncbi.nlm.nih.gov/?term=%28%28%28%28%28%28%28%28%28%28%28ART+Adherence%5BTitle%2FAbstract%5D%29+OR+%28ART+Compliance%5BTitle%2FAbstract%5D%29%29+OR+%28Antiretroviral+Adherence%5BTitle%2FAbstract%5D%29%29+OR+%28ART+Medication+Adherence%5BTitle%2FAbstract%5D%29%29+OR+%28ART+Treatment+Compliance%5BTitle%2FAbstract%5D%29%29+OR+%28Anti+retroviral+Therapy+Adherence%5BTitle%2FAbstract%5D%29%29+OR+%28Anti-retroviral+Therapy+Adherence%5BTitle%2FAbstract%5D%29%29+%29+OR+%28HAART+Adherence%5BTitle%2FAbstract%5D%29%29+OR+%28Highly+Active+Antiretroviral+Therapy+Adherence%5BTitle%2FAbstract%5D%29%29+%29+OR+%28Retention+of+HIV+Care%5BTitle%2FAbstract%5D%29%29+OR+%28Viral+Suppression%5BTitle%2FAbstract%5D%29&sort=) | 07:28:38 |

**Search Strategy for CINAHL**

AB (antiretroviral therapy adherence or anti-retroviral therapy adherence or antiretroviral adherence) OR HAART adherence OR ART Medication Compliance OR Antiretroviral Medication Compliance OR ART retention of care OR Viral Suppression OR ART compliance

AB (adolescent) OR AB (Teenager) OR AB (Young adult) OR AB (Young person) OR AB (Pubescent) OR AB (Youth) OR AB (Adolescent living with HIV) OR AB (ALHIV)

**Final Query CINAHL AND MEDLINE**

AB ((antiretroviral therapy adherence or anti-retroviral therapy adherence or antiretroviral adherence) OR HAART adherence OR ART Medication Compliance OR Antiretroviral Medication Compliance OR ART retention of care OR Viral Suppression OR ART compliance) AND AB ((adolescent) OR AB (Teenager) OR AB (Young adult) OR AB (Young person) OR AB (Pubescent) OR AB (Youth) OR AB (Adolescent living with HIV) OR AB (ALHIV))

**Search strategy for Web Of Science**

<https://www.webofscience.com/wos/woscc/summary/f4f1e8b6-3da5-48dc-b7da-3fd8c714f263-01a1265b0a/relevance/1>

Query #2

**AB=( (antiretroviral therapy adherence or anti-retroviral therapy adherence or antiretroviral adherence) OR HAART adherence OR ART Medication Compliance OR Antiretroviral Medication Compliance OR ART retention of care OR Viral Suppression OR ART compliance)**

Query #5

**AB=( (adolescent) OR AB (Teenager) OR AB (Young adult) OR AB (Young person) OR AB (Pubescent) OR AB (Youth) OR AB (Adolescent living with HIV) OR AB (ALHIV))**

Top of Form

**6**

**#2 AND #5**

[**1,092**](https://www.webofscience.com/wos/woscc/summary/08b1f943-8b95-4ed6-b42b-ef63b87b0560-01a126dbcb/relevance/1)

**5**

**AB=( (adolescent) OR AB (Teenager) OR AB (Young adult) OR AB (Young person) OR AB (Pubescent) OR AB (Youth) OR AB (Adolescent living with HIV) OR AB (ALHIV))**

[**319,504**](https://www.webofscience.com/wos/woscc/summary/7fb1def4-31f3-4b2e-9749-e49d090c02f6-01a126af90/relevance/1)

**AB=( (antiretroviral therapy adherence or antiretroviral therapy adherence or antiretroviral adherence) OR HAART adherence OR ART Medication Compliance OR Antiretroviral Medication Compliance OR ART retention of care OR Viral Suppression OR ART compliance)**

[24,685](https://www.webofscience.com/wos/woscc/summary/f4f1e8b6-3da5-48dc-b7da-3fd8c714f263-01a1265b0a/relevance/1)
