# Supplementary material
Source: Research Square preprint supplement (doi:10.21203/rs.3.rs-9953387/v1)
Supplement: Supplementary file 2 [file 21c0ecfdf8ecd46dc9caf08c.docx]

**CODEBOOK: Barriers and Enablers to Antiretroviral Therapy Adherence among Adolescents Transitioning from Pediatrics to Adult HIV Care in Sub-Saharan Africa: A Scoping Review**.

This comprehensive codebook was developed for the thematic analysis of the scoping review titled “Barriers and Enablers to Antiretroviral Therapy Adherence among Adolescents Transitioning from Pediatrics to Adult HIV Care in Sub-Saharan Africa: A Scoping Review. ”It is structured to address specific research questions.

- What are the patient-level and psychological factors that influence ART adherence among adolescents transitioning from paediatrics to adult HIV medical care?
- What are the healthcare system-level barriers and enablers that influence ART adherence among adolescents transitioning from paediatrics to adult HIV medical care?

The codebook covers four main domains relevant to the research question to maintain reproducibility, transparency, and comparability. The inductive-deductive approach was used with the data extraction framework and thematic analysis.

- patient-level and psychological barriers that influence ART adherence among adolescents transitioning from paediatrics to adult HIV medical care
- patient-level and psychological enablers that influence ART adherence among adolescents transitioning from paediatrics to adult HIV medical care
- healthcare system-level barriers that influence ART adherence among adolescents transitioning from paediatrics to adult HIV medical care
- healthcare system-level enablers that influence ART adherence among adolescents transitioning from paediatrics to adult HIV medical care

**Patient-level and psychological barriers that influence ART adherence among adolescents transitioning from paediatrics to adult HIV medical care**

| **Code(s)** | **Description** | **When to Use** | **When Not to Use** | **Authors** |
| --- | --- | --- | --- | --- |
| Depression, Anxiety, | The feeling of hopelessness, anxiety, and apathy towards ART adherence | Mental health challenges | General stress not related to mental health | (Dahourou et al., 2017a; Sam-Agudu et al., 2017; Zanoni et al., 2022) |
| Transition-related stress | Any form of stress related to being transferred from pediatric to adult | Loss of familiar care, fear of adult clinics, Uncertainty, shift to adult responsibility | Stress not related to transition | (Gitahi et al., 2020; Mugo et al., 2023a; Petinger et al., 2025; Tsondai, Sohn, Phiri, Sikombe, Sawry, Chimbetete, Fatti, Hobbins, Technau, et al., 2020) |
| Internalised Stigma | Negative perception of HIV status | Shame, self-blame, and denial of Hive status | Stigma without internalization | (Bekker et al., 2015; Hung & Wei, 2025) |
| Fear of Disclosure | Avoidance of behavior due to HIV disclosure | Secrecy, fear of discrimination, and non-disclosure to peers | Full disclosure situations | (Kipkurui et al., 2023; Sam-Agudu et al., 2017) |
| Poor acceptance of HIV status | Denial of HIV status | Identity conflict, Denial, | Full agreement to HIV status | (Bekker et al., 2015; Zanoni et al., 2021) |

**Theme 1:** **Psychological Distress and Mental Health Challenges**

**Theme 2:** **Individual Factors**

| **Code(s)** | **Description** | **When to Use** | **When Not to Use** | **Author(s)** |
| --- | --- | --- | --- | --- |
| Poor knowledge of ART | Insufficient knowledge of ART | Reduced awareness of lifelong treatment, misunderstanding of dosing | Adequate knowledge of art | (Meloni et al., 2020; Tsondai, Sohn, Phiri, Sikombe, Sawry, Chimbetete, Fatti, Hobbins, Unter Technau, et al., 2020) |
| Lack of preparation for transition | Insufficient transition preparation to adult HIV care | Limited structured education, unclear expectation of adult care | Adequate transition preparedness | (Mugo et al., 2023a; Petinger et al., 2025) |

**Theme 3: Self-Management Challenges and Autonomy**

| **Code(s)** | **Description** | **When to Use** | **When Not to Use** | **Author(s)** |
| --- | --- | --- | --- | --- |
| Poor adherence skills | Inability to independently manage ART | Forgetfulness, Lack of routines, or self-management | Use of digital tools as reminders, follows routine | (Gitahi et al., 2020) |
| self-efficacy challenges | Inability to effectively handle ART | Dependence of caregivers on ART management | Demonstrate autonomy | (Zanoni et al., 2021) |
| Adolescent development factors | Adolescent age-related factors influence adherence to ART | Resistance to routine, denial, risk-taking | Being responsible | (Bekker et al., 2015) |

**Theme 4: Treatment Fatigue and Motivation**

| **Code(s)** | **Description** | **When to Use** | **When Not to Use** | **Author(s)** |
| --- | --- | --- | --- | --- |
| Underestimating consequences | Having a low risk perception of non-adherence | Adolescents exhibit non-adherence when asymptomatic | Being aware of the consequences of ART | (Meloni et al., 2020; Zanoni et al., 2022) |
| ART exhaustion | Over time, the use of ART leads to reduced ART fatigue and motivation | Pill burnout, Pill burden, ART exhaustion | Short-term ART health challenges | (Dahourou et al., 2017) |

**Theme 5: Institutional Factors**

| **Code(s)** | **Description** | **When to Use** | **When Not to Use** | **Author(s)** |
| --- | --- | --- | --- | --- |
| Rigid schedules | Organizational constraints affecting ART adherence | Rigid schedules, Inability to store drugs, Inability to take drugs discreetly, and Clash of work. school and clinic schedules | Supportive working and school environment | (Kipkurui et al., 2023) |

**Theme 6:** **Care Gaps**

| **Code(s)** | **Description** | **When to Use** | **When Not to Use** | **Author(s)** |
| --- | --- | --- | --- | --- |
| Previous history of non-adherence in paediatrics care | Gaps in care, Poor Adherence in paediatrics care | Missed hospital appointment in pediatric, loss to follow-up | Continuous ART adherence in paediatric | (Tsondai, Sohn, Phiri, Sikombe, Sawry, Chimbetete, Fatti, Hobbins, Technau, et al., 2020) |

**Theme 7: Social Support and Care Dynamic**

| **Code(s)** | **Description** | **When to Use** | **When Not to Use** | **Author(s)** |
| --- | --- | --- | --- | --- |
| Loss of Caregiver Support | Reduced parental or school nurse support post transition | Loss of caregiver, reduced parental involvement, and independence leading to non-adequacy | Continued caregiver involvement | (Mugo et al., 2023) |
| Negative peer influence | Peer pressure influencing ART adherence | The desire to be like friends, the desire to fit in, negative peer pressure, peer inquisitiveness, and adolescents valuing social acceptance of peers over ART adherence | Positive Peer support | (Kipkurui et al., 2023) |

**Patient-level and psychological facilitators that influence ART adherence among adolescents transitioning from paediatrics to adult HIV medical care**

**Theme 8: ART therapy Literacy**

| **Code(s)** | **Description** | **When to Use** | **When Not to Use** | **Author(s)** |
| --- | --- | --- | --- | --- |
| Understanding the ART benefit | Understanding the ART benefit, knowledge, and consequences of non-adherence | Understanding the ART benefit, knowledge, and consequences of non-adherence | When there is limited knowledge of ART, when there is adequate knowledge, but it does not lead to ART adherence | (Bekker et al., 2015; Zanoni et al., 2020) |
| Structured Transition | Formal preparation for adult HIV care, counseling, and readiness program | Organized, standardized transition structure | Lack of structured transition preparation | (Mugo et al., 2023; Zanoni et al., 2021) |

**Theme 9: Psychological and Resilience Support**

| **Code(s)** | **Definition** | **When to Use** | **When Not to Use** | **Author(s)** |
| --- | --- | --- | --- | --- |
| Adaptive coping mechanism | Positive psychological strategies mechanisms, | Encouraging coping mechanism, resilience, | Distressed or maladaptive coping | (Gitahi et al., 2020) |
| Emotional and Psychological support, | Access Counseling support, | Psychological interventions, therapy | Limited mental intervention | (Sam-Agudu et al., 2017) |
| Self-acceptance, | Positive HIV integration | Acceptance, reduced-self stigma and self-discrimination, openness | Self denial | (Sam-Agudu et al., 2017) |
| Disclosure to Trusted Individuals | safe disclosure environment | Trusted individuals, conducive environment to disclose status, lack of fear | When adolescent fear disclosing due to trust issues | (Zanoni et al., 2022) |

**Theme 10: Self-Readiness and Management Skills**

| **Code(s)** | **Description** | **When to Use** | **When not to Use** | **Author(s)** |
| --- | --- | --- | --- | --- |
| Adherence to routine | Structured medication adherence behaviors | Reminder system, routine habit | Irregularbehavior, when routines are inconsistent | (Meloni et al., 2020) |
| Transition readiness | Preparation for adult HIV care | Demonstrates autonomy, ability to independently take medications, and manage HIV care | When readiness is assumed, dependence | (Mugo et al., 2023) |

**Theme 11: Community and Social Support**

| **Codes** | **Description** | **When to Use** | **When not to Use** | **Author(s)** |
| --- | --- | --- | --- | --- |
| Peer support | Support from Age-appropriate colleagues/adolescents | Support from friends, peer support networks, and peer groups | No support from peers, negative peer influence | (Kipkurui et al., 2023) |
| family support | Ongoing caregiver support | Monitoring, emotional support, family reminders | Absence or Limited family support | (Tsondai, Sohn, Phiri, Sikombe, Sawry, Chimbetete, Fatti, Hobbins, Unter Technau, et al., 2020) |

**Health System Level facilitators that influence ART adherence among adolescents transitioning from pediatrics to adult HIV medical care**

**Theme 12: Health System Structure and Coordination**

| **Codes** | **Description** | **When to Use** | **When not to Use** | **Authors** |
| --- | --- | --- | --- | --- |
| Lack of seamless linkage in health services | Disconnected health services leading to poor service integration | Lack of coordination in different services, fragmented mental health services, fragmented STI clinic, Fragmented medical services, loss to follow-up | Integrated clinics  Comprehensive clinics | (Bekker et al., 2015) |
| Lack of communication between the career | Weak handoff among health service providers | Referral gap, weak communications | Well-prescribed communication outflow | (Sam-Agudu et al., 2017a) |
| Non-friendly adolescent-adult clinics | Non-adolescent-friendly clinics | overburdened, depersonalized adult settings; long waits; unfriendly staff | Youth-friendly clinics | (Bekker et al., 2015) |

**Theme 12: Provider and Staffing Factors**

| **Code(s)** | **Description** | **When to Use** | **When not to Use** | **Author(s)** |
| --- | --- | --- | --- | --- |
| Lack of trained nurses | Lack of adolescent-specific skills and staff inconsistency | Providers lack skills in adolescent counseling | Highly skilled health professionals | (Kipkurui et al., 2023) |
| Negative attitudes | Unpleasant,Judgmental attitude towards adolescents | Poor behaviors from health professionals that make ART difficult for adolescents | Positive attitude | (Kipkurui et al., 2023) |

**Theme 14: Policy and structural factors**

| **Code(s)** | **Description** | **When to Use** | **When not to Use** | **Author(s)** |
| --- | --- | --- | --- | --- |
| Lack of policy inclusion | Lack of standardized transition protocol | No specific national guidelines, lack of policy inclusion, policies exist but are poorly implemented | Unified transition protocol | (Petinger et al., 2025) |
| Legal Barriers | Regulatory constraints | Structural difficulties that prevent adolescents from accessing ART | Enabling laws that remove barriers | (Bekker et al., 2015; Hung & Wei, 2025) |
| Rigid age threshold | Transition based on age and not maturity to handle adherence | No readiness assessment, Age-based transition only | Readiness assessment | (Tsondai, Sohn, Phiri, Sikombe, Sawry, Chimbetete, Fatti, Hobbins, Technau, et al., 2020) |

**Enabling Factors at The Health System Level That Affect ART Adherence Among Adolescents in Sub-Saharan Africa**

**Theme 15: Structured transition Intervention**

| **Code(s)** | **Description** | **When to Use** | **When not to Use** | **Author(s)** |
| --- | --- | --- | --- | --- |
| Coordinated Transition model | Guided, proactive transition protocol | PAPA Models, Early preparation coordination, structured transition | Informal transitions, unstructured transition model | (Sam-Agudu et al., 2017) |
| Readiness Assessment Tools | Tools to evaluate clinical readiness score for adult transition | Readiness assessment score, checklist, maturity assessment | No tool assessment | (Zanoni et al., 2021) |

**Themes 16: Technology Resources**

| **Codes** | **Description** | **When to Use** | **When not to Use** | **Authors** |
| --- | --- | --- | --- | --- |
| Digital Tools | Technology supporting adherence | Digital reminders, social media, SMS, apps, advocacy groups | Traditional methods, no technology tools | (Kipkurui et al., 2023) |

**Theme 17: Healthcare Environment**

| **Code(s)** | **Description** | **When to Use** | **When not to Use** | **Author(s)** |
| --- | --- | --- | --- | --- |
| Youth-friendly Environment | Adolescent-centered care | Teen clinics, youth-friendly clinics, sense of belonging | Adult-centered care | (Mugo et al., 2023) |
|  |  |  |  |  |

**Theme 18: Community-level Environment**

| **Code(s)** | **Describe** | **When to Use** | **When not to Use** | **Author(s)** |
| --- | --- | --- | --- | --- |
| Community ART delivery | ART care at the community level | Decentralized care, community ART care, holistic care | Health facility-specific care | (Dahourou et al., 2017) |
