# Supplementary material
Source: Research Square preprint supplement (doi:10.21203/rs.3.rs-9953387/v1)
Supplement: Supplementary file 3 [file 32c8775cfc837f9793aa27b6.xlsx]

## Sheet: Sheet1
Study's Author(s), Year	Setting/Country	Study’s Aim/	Study Design	Population Characteristics	Measures Of ART Adherence	Transition Focus	Facilitator of ART Adherence	Barriers of ART Adherence	Determinant of ART	Summary of Findings
		Objectives
	KwaZulu-Natal, South Africa	To determine rates of retention and viral suppression among adolescents living with perinatally acquired HIV who remained in paediatrics care compared to those who transitioned to adult care.	natural experiment	Paediatric clinic (n = 145) Transitioned to adult clinic (n = 35)	Viral Suppression	Yes			Health care setting types	Adolescents who transitioned to the adult clinic had a lower rate of retention in care (49%; 17/35) compared to adolescents remaining in the pediatric clinic (92%; 134/145; p = <0.001)
(Zanoni et al., 2020)					Virally suppressed at most recent results for pediatrics- 102 (78)
				adolescents who turned age 12 between 2011 and 2014
					For those who transitioned 23 (74)
(Meloni et al., 2020)	The Jos University Teaching Hospital, United States President’s Emergency Plan for AIDS Relief (PEPFAR)-funded HIV clinic in Jos, Plateau State, Nigeria	To describe long-term trends in adherence, retention, and virologic suppression in adolescents receiving ART at a paediatrics HIV clinic in Nigeria through transition to the adult clinic.	Retrospective observational longitudinal	476 patients received at least one dose of ART as an adolescent (ages 10–19 years)	Medication Proportion ration	Yes			Age at ART adherence	For patients that successfully transitioned to adult-centered care, 87.7% (50/57) were retained at month 12 post-transition, but only 34.6% (9/26) had viral load suppression.
					proportion of patients with 95% MPR and the				Age at initiation of ART
									Female
					Virologic suppression, we measured				ART Experience
					<400 copies/mL				Duration on ART
									Transmission via mother to Child
									Enrollment year
									Duration on ART
(Petinger et al., 2025a)	Low-Middle Income Countries, including South Africa	To explore ALHIV’s experiences with practices facilitating their transition from pediatric to adult HIV care programs in low and middle-income countries	Qualitative Evidence synthesis	Adolescents (10-19 years) living with HIV	Self-reported adherent	Yes	Youth-friendly clinics	Knowledge about treatment	Health education, Family and friends assist in remi	Development of interventions in the form of a guided transition protocol should be incorporated to improve the transition experiences of ALHIVs.
							Collaborative care	Non-Full disclosure	,
							Communication between care providers and health care providers, structured transition	Uninformed about the transition
								, engagement in care, and mental wellness	emotional support structures
								Change
								Change in provide
								School work conflict
(Petinger, Crowley, & Wyk, 2025)	South Africa	To report on the experiences and challenges of transition for ALHIV who received ART at an adolescent-friendly service that is adjunct to a public primary healthcare facility in the Western Cape province of South Africa	Photovoice/participatory research method	Adolescent living with HIV	Self-reported adherence and challenges-	Three adolescent HIV care transition types were identified, highlighting the need for supportive, youth-friendly transition models.	Family and peer support	Fear and apprehension at adult clinics, long waiting time, pill count fatigue, forgetfulness,	Personal.Apsycologicla	Transition experiences and self-management behaviors in adolescent HIV adolescent or youth friendly services for ALHIV be expanded to support and monitor the transition process and outcomes in the adult HIV program. care
				Age (in years) n=24 13–15 8			supportive health care environment	Changes in routine	Peer support, Hospital encironment
				16–19 16			Sense of belonging	Fear of isolation in an adult clinic	Transition readiness
							Internal motivation and acceptance	Lack of peer support in the adult clinic
				Sex			Use of reminders
				Female 15 Male 9
(Dahourou et al., 2017)	South Africa, Kenya, Uganda,	To highlight the different existing models of care for transition and transition outcomes.	Narrative review	Adolescents 10-24years	Not directly measured-loss to follow up	Transition models include teen clinics, peer educators, and social media.	Youth friendly adolescent clinic	Lack of adequate infrastructure, staff training, and communication between paediatric and adult clinicians, the fear of stigma of adolescents and youth living with HIV	Policy guideline	Transition outcomes for HIV-infected adolescents
	Tanzania, Botswana, Malawi		All qualitative and quantitative, experimental and observational studies				Integrated care models	Most countries have no specific national guidelines on when to disclose HIV status or when and how to transition to adult care. Several models of care adapted to the adolescent transition question have been implemented in specific settings	Continuity of care
							Social Medica engagement		Psychocosocial care	High attrition and care challenges occur during HIV adolescent transition to adult care in Africa.
Po-Pin Hung1 and	Global -32 countries, including Kenya, South Africa, Zambia, Namibia, Zimbabwe	To identify factors and transition strategies associated with improved engagement in care, particularly retention and viral suppression, among adolescents and young adults moving from pediatric to adult HIV services.	Systematic Review	Adolescents living with HIV (10-24 years)	Viral suppression,	yes	Early preparation, structured handoff, digital reminders,	Loss of support, stigma, unpreparedness, and mental health challenges	Age at transfer, psychological support, seamless linkage, structured programme	Retention declined to ~70% by two years and viral suppression to roughly two-thirds, below global targets. Older transfer age and minimal gaps between pediatric discharge and adult enrollment were associated with better retention. Structured programs combining early preparation, coordinated handoffs, psychosocial/peer support, and youth-friendly adult services consistently improved engagement (of…
Hsi-Hsien Wei2, 2025					Adherence mortality, transition readiness, retention in care		Individualize readiness,	Legal constraints, psychological stress,
							Youth friendliness
(Sam-Agudu et al., 2017)	Nigeria	The primary outcome measure is the proportion of ALHIV retained in care at 12 and 24 months post transfer. Secondary outcome measures are the proportions of ALHIV achieving viral suppression and demonstrating increased psychosocial well-being and self-efficacy, as measured by psychometric tests, including health locus of control, functional social support, perceived mental health, and sexual risk…	Randomized Control Trial-Study	13- to 17-year-old ALHIV (N = 216, n = 108 per study arm) on antiretroviral therapy.	Viral Suppression	YES	Graduated pediatrics-adult clinic visits(PAPA Model), case management team, patient advocate, peer-led organized support, structured curriculum	Psychological support	Individual	The primary outcome measure is the proportion of ALHIV retained in care at 12 and 24 months post transfer. Secondary outcome measures are proportions of ALHIV achieving viral suppression and demonstrating increased psychosocial wellbeing and self-efficacy measured by psychometric tests including health locus of control, functional social support, perceived mental health, and sexual risk and behav…
					Retention in care -12 to 24 months post transfer, psychological wellbeing using HLC, MHC-SF, FSSQ, SRBBS			Lack of communication between pediatric and adult,	Peer support,
								Loss of a pediatric family	Health system
(Tsondai et al., 2020)	Lesotho, Malawi, Mozambique, South Africa, Zambia, and Zimbabwe	To evaluate gaps in care and viral suppression in AYLH in the year before and after their 16th, 18th, 20th, and 22nd birthdays, using these different age thresholds as proxies for when “transition” to autonomy may occur in the context where adolescents remain at the same facility through to adulthood.	Observational cohort study	Analyses included 5516 (51% female) AYLH at transition-16y, 3864 (53% female) at transition-18y, 1463 (54% female) at transition-20y and 440 (59% female) at transition-22y thresholds	Viral suppression (HIV-RNA <400 copies/mL) in the 12 months before and after each age threshold.	yes	No gaps in the preceding year	Gaps in care	Pre-transition health care service	The strongest predictor of being retained post-transition was having no gap in the preceding year, across all transition age thresholds
			Multi-country, longitudinal analysis				Moderate clinic size-51-100 transition	Poor treatment adherence in pediatric care	Age at enrolment -< 10years
					No gaps in care->2 clinic visit, > 2 months apart in 12months pre and post transition			larger clinic transition cohort > 200	Clinic size
(Gitahi et al., 2020)	Kenya	This study aimed to determine individual factors affecting ART adherence among older HIV positive adolescents transitioning to adult care.	Cross-sectional Study	82 perinatally infected adolescents aged 16-19 years in an HIV care and treatment clinic	A previously validated self-report adherence tool was used for adolescents and pediatric patients living with HIV, previously used in the Pediatric AIDS Clinical Trials Group. (Van Dyke et al., 2002).	yes	Individual	Individual	Social support	Sixty-four per cent (52) of the adolescents reported optimal adherence was of >95%, and 15% reported missing doses for three or more months. Self -reported adherence had a high correlation with viral loads of <1000 copies ml (Kappa= 0.087). Adolescents with high self-efficacy were eight times more likely to report adherence of >95% [OR 8.1, 95% CI(2.31– 28.18)]. Once a day, dosing was also indepe…
								Health facility-Intervention level	Age
									No of doses
									Averse effect
									No of years on ART
(Bekker et al., 2015)	Global Setting Including Sub-Saharan Africa-Kenya, Malawi, Mozambique, Tanzania, Uganda, Zimbabwe, Zambia	To provide evidence-based recommendations to optimize HIV care	Systematic Guideline	Adolescents 10-19years living with HIV	Not measured directly	yes	Youth-friendly services, structure transition programme, disclosure support, peer group, community-based ART delivery	Stigma, mental health challenges, lack of adolescent-friendly services, legal barriers, poor access to services, and a fragmented care system		Social, structuralhealth system structures
					Viral suppression
(Zanoni et al., 2021)	South Africa	To determine facilitators and barriers to successful transition to adult care for adolescents living with perinatally-acquired HIV in South Africa.	Prospective cohort analysis	30 adolescents living with perinatally-acquired HIV after their pediatrician deemed them ready for transition to adult care, but prior to their transition.	Viral load suppression, retention in care, clinic attendance, self-reported attendance	yes	Peer support, continuity of care, adolescent-friendly services,	Loss of per network, emotional distress, stress, loss of trusted providers, and an unfriendly adult clinic	Psychosocial behavorial, health sytem	Transition readiness assessments are needed to determine optimal timing of transition and which adolescents are ready to transition to adult care.
							Good transition programmes
(Zanoni et al., 2022)	Prince Mshiyeni Hospital, South Africa	identified factors associated with successful transition from pediatric to adult care for adolescents living with HIV in South Africa. We then used these factors to create a transition readiness score to assist clinicians in determining readiness and identifying modifiable factors to prepare for transition.	Prospective Cohort (Observational study)	199 adolescents who transitioned to adult care	Viral suppression	yes	Early ART initiation	Alcohol Use	First line ART	This transition readiness score can be used to identify adolescents who are likely ready to transition to adult care and identify additional areas for intervention to improve the likelihood of successful transition for those with lower transition readiness scores
							Transition Readiness and Success	Female	Disclosed HIV status
							HIV status disclosure	Late ART initiation	HARTS score
								illicit drug use	Alcohol ever use
									Age at ART initiation
(Mugo et al., 2023)	Kenya	To identify factors and transition strategies associated with improved engagement in care, particularly retention and viral suppression among adolescents and young adults moving from pediatric to adult HIV services	Qualitative Study design	Adolescents undergoing transition	Self-reported adherence behavior	yes	n. Structured programs combining early preparation, coordinated handoffs, psychosocial/peer support, and youth-friendly adult services consistently improved engagement (often >90% 12-month retention),	Poor transition	Individual	Purposeful, well-supported transition models are essential to sustain treatment success into adulthood; future work should evaluate scalable delivery and long-term outcomes across diverse settings.
					Clinic engagement and consistency with medication			Stigma and fear	PschologicaL
								Unfriendly adult clinics,	Health Services
								Forgetfulness	Social support
								Treatment fatigue
								Wealth Health System
(Petinger et al., 2025b)	South Africa	To review the current policy guiding the transition from pediatric to adult care for adolescents living with HIV in the public health sector	Policy REVIEW	Adolescents 10-19 years with HIV transitioning	Viral Suppression	yes	Adequate transition readiness and preparedness, adolescent-friendly services, peer support services, training of healthcare workers in adolescent	Lack of national policy, insufficient adolescent-specific services	Policy inclusion on structural, psychological, structural, readiness to transition, suppot system, communication strategy , Hiv related stigma	Global policies and implementation guidelines emphasize specific, comprehensive care for ALHIV on ART, but these are not reflected in national and provincial policies in South Africa. Further development of policies is required to guide comprehensive, adolescent-friendly transition processes for ALHIV on ART in South Africa
			Content analysis of 8 policy documents from global, national, provincial, and implementation levels					Age-based transition rather than transition readiness
								Limited implementation guideline,
(Kipkurui et al., 2023)	Boarding schools in Nairobi, recruitment from Pumwani Hospital	examined the experiences of ALHIV, caregivers of adolescents, and school nurses regarding navigating ART adherence in boarding secondary schools.	Qualitative Study	36 Participants, 18 ALHIV, 15-19 years attending boarding schools in Nairobi, Kenya, and 11 caregivers of ALHIV, and in-depth interviews (IDIs) with 7 school nurses.	Self-reported adherence behaviors (pill-taking routine, missed doses, pill count by nurses, coping strategies)	Indirectly, a boarding house gives adolescents autonomy with limited supervision	Friendly confidential school nurses,	Stigma and Fear of Disclosure	Individual	. All school nurses reported lacking appropriate training in HIV adherence counseling for adolescents. ALHIV have devised innovative strategies to navigate pill-taking and enlist quiet support while operating in stigmatized school environments. Establishment of a strong school nurse-adolescent rapport and building nurses’ skills are key to improving school-based support for ALHIV.
							Disclosure to trusted staff, Peer support among students living with HIV,		Care givers
							, medication storage, Digital reminders including alarms, storage, alarm system, Individual access to privacy, waiting until students were engaged in other activities, waking up early, stepping away from others, and stating their drugs were for different ailments	Lack of privacy in the dormitory and clinics	SchoolEnvironment
								Inadvertent disclosure (searches, peers seeing drugs)	Peer Support
								School policy(drug confiscation, drug storage)	Psychological factors
								Competing with school activities, and the fear of being seen at the clinic
								Negative attitude from teachers
								Lack of trained nurses
								Psychological stress and Denials od status
